# Supplementary material
Source: Springer Nature journal article supplement (https://www.springermedizin.de/resource/supplementary/12876_2011_777_MOESM3_ESM.pdf/9437764)
Supplement: MOESM3 [file 9437764]

**Additional file 3**

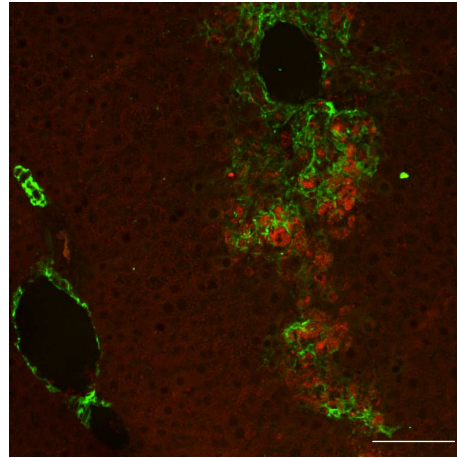

**alpha-SMA/desmin**

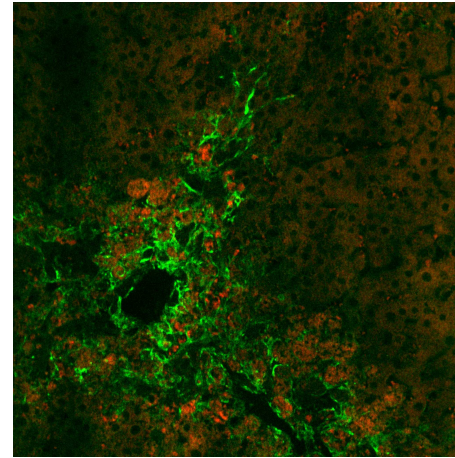

**alpha-SMA/nestin**
